# Supplementary material
Source: PubMed Central journal article supplement (PMC3223263)
Supplement: NIHMS318160-supplement-01.pdf [file NIHMS318160-supplement-01.pdf]

# Suppl. Figure 1

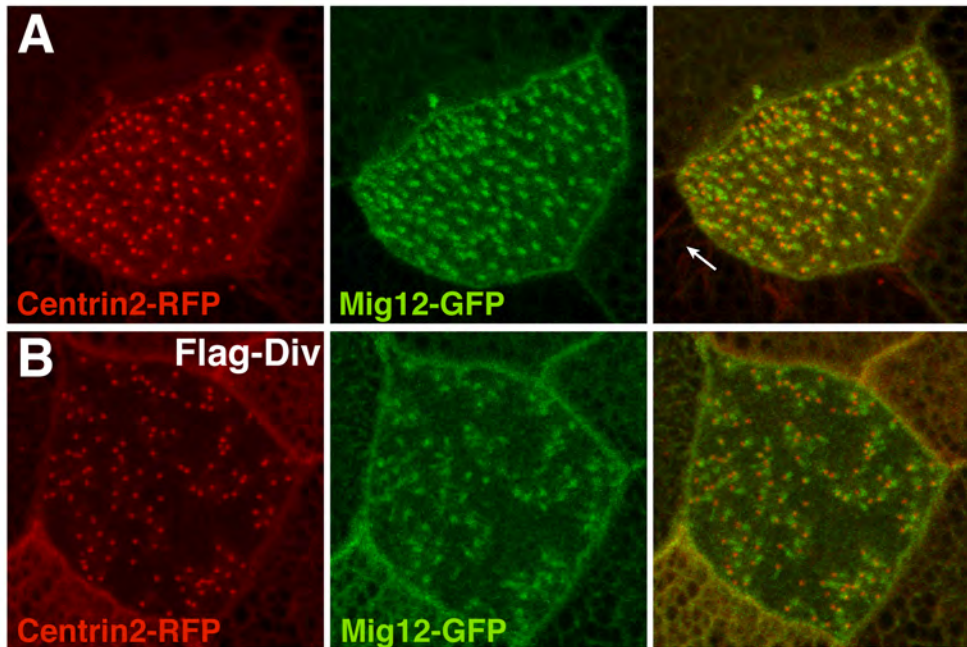

Supplementary Table 1 Sequence of Primers used for cloning

| <b>Construct Name</b>  | <b>Sequences</b>                                                                      |
|------------------------|---------------------------------------------------------------------------------------|
| Myc- $\gamma$ -tubulin | F; 5'-CGGAATTCAACCATGCCCCGGGAGATCAT-3'<br>R; 5'-GAAGATCTTCACTGCTCCTGGGTACCCC-3'       |
| Centrin2-RFP           | F; 5'-GCGAATTCATGGCCTCTGTTCTGCGTAA-3'<br>R; 5'-GGCTCGAGTTAGCAAAGGCTTGTCTTTC-3'        |
| Centrin2-GFP           | F; 5'-GCGAATTCACCATGGCCTCTGTTCTGCGTAA-3'<br>R; 5'-GCGGATCCTTGCAAAGGCTTGTCTTTCTCA-3'   |
| Mig12-GFP              | F; 5'-GCGAATTCACCATGATGCAGATATCAGATACC-3'<br>R; 5'-GCGGATCCAAATGTCCCCAACTGCCAAACCC-3' |
| XtDiversin-GFP         | F; 5'-CCATCGATATTCATGAGCCAGCAGGATGTG-3'<br>R; 5'-CGGGATCCTTGCTCTCTTTCTGAAGTTTAGT-3'   |
